# Supplementary material for: An external template-free route to uniform semiconducting hollow mesospheres and their use in photocatalysis
Source: Royal Society of Chemistry journal article supplement (doi:10.1039/c5nr02685g), 2015-01-01
Supplement: c5nr02685g1.pdf [file c5nr02685g1.pdf]

## Supporting Information

### An External Template-Free Route to Uniform Semiconducting

### Hollow Mesospheres and Their Use in Photocatalysis

Di Yang,<sup>\*a,b</sup> Mengye Wang,<sup>b,c</sup> Bin Zou,<sup>a</sup> Gu Ling Zhang,<sup>a</sup> and Zhiqun Lin<sup>\*b</sup>

a. College of Science, Minzu University of China, Beijing 100081, China. Email:

[diyang@muc.edu.cn](mailto:diyang@muc.edu.cn)

b. School of Materials Science and Engineering, Georgia Institute of Technology, Atlanta,

Georgia 30332, United States. Email: [zhiqun.lin@mse.gatech.edu](mailto:zhiqun.lin@mse.gatech.edu)

c. State Key Laboratory of Physical Chemistry of Solid Surfaces, College of Chemistry and Chemical Engineering, Xiamen University, Xiamen 361005, China.

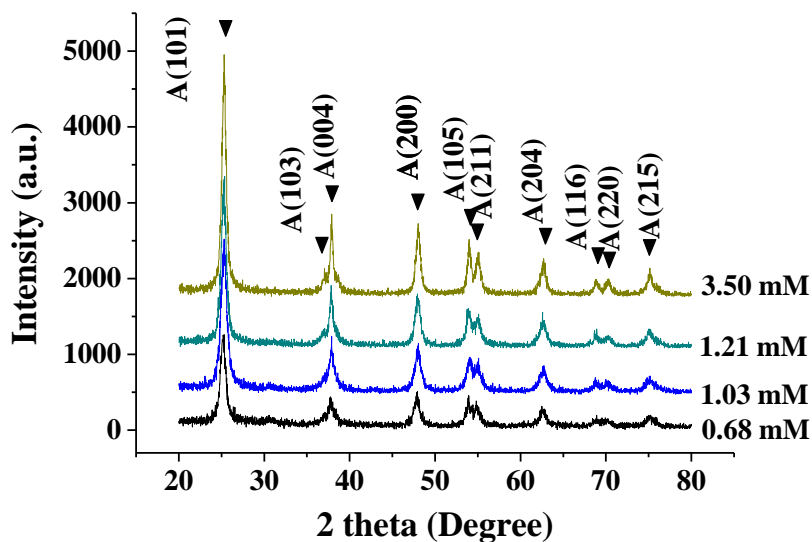

**Figure S1.** XRD pattern of hollow TiO<sub>2</sub> mesospheres prepared by varying the molar concentration of the precursor Ti(OBu)<sub>4</sub> in acetone. The hydrothermal reaction occurred at 180°C for 15 h.
